# Supplementary material for: Clinical and Biologic Correlates of ADORA2A Transcriptomic Expression in Cancer
Source: MDPI journal article supplement (doi:10.3390/ijms25094742), 2024-04-26
Supplement: s1 [file s1]

Supplementary Table S1: Patient Demographics

| Variable                                 | N = 514 <sup>1</sup> |
|------------------------------------------|----------------------|
| Age (median (range))                     | 61 (24, 93)          |
| Sex                                      |                      |
| Female                                   | 310 (60%)            |
| Male                                     | 204 (40%)            |
| PD-L1 immunohistochemistry >=1           | 156 (30%)            |
| (Missing)                                | 1                    |
| Microsatellite instability high          | 15 (3.4%)            |
| (Missing)                                | 74                   |
| Tumor mutational burden ≥10 mutations/mb | 33 (7.3%)            |
| (Missing)                                | 64                   |
| High ADORA2A expression                  |                      |
| High (≥75 <sup>th</sup> percentile rank) | 107 (20.8%)          |
| Low                                      | 407 (79.2%)          |
| Cancer Types                             |                      |
| Adrenal Gland Cancer                     | 3 (0.6%)             |

| Variable                                   | N = 514 <sup>†</sup> |
|--------------------------------------------|----------------------|
| Basal Cell Carcinoma of the Skin           | 1 (0.2%)             |
| Bladder Cancer                             | 4 (0.8%)             |
| Brain and Nervous System Cancer            | 3 (0.6%)             |
| Breast Cancer                              | 49 (9.5%)            |
| Cervical Cancer                            | 5 (1.0%)             |
| Colorectal Cancer                          | 140 (27%)            |
| Esophageal Cancer                          | 17 (3.3%)            |
| Gallbladder/Extrahepatic Bile Duct Cancers | 4 (0.8%)             |
| Head and Neck Cancer                       | 12 (2.3%)            |
| Kidney and Renal Pelvis Cancer             | 3 (0.6%)             |
| Lipomatous Neoplasms                       | 2 (0.4%)             |
| Liver and Bile Duct Cancer                 | 19 (3.7%)            |
| Lung Cancer                                | 20 (3.9%)            |
| Melanoma                                   | 6 (1.2%)             |
| Mesothelioma                               | 2 (0.4%)             |
| Neuroendocrine Tumors                      | 15 (2.9%)            |

| Variable                            | N = 514 <sup>†</sup> |
|-------------------------------------|----------------------|
| Ocular melanoma                     | 1 (0.2%)             |
| Ovarian Cancer                      | 43 (8.4%)            |
| Pancreatic Cancer                   | 55 (11%)             |
| Primary peritoneal carcinoma        | 1 (0.2%)             |
| Prostate Cancer                     | 4 (0.8%)             |
| Sarcoma                             | 24 (4.7%)            |
| Small Intestine Cancer              | 12 (2.3%)            |
| Squamous Cell Carcinoma of the Skin | 3 (0.6%)             |
| Stomach Cancer                      | 25 (4.9%)            |
| Thymic Cancer                       | 1 (0.2%)             |
| Thyroid Cancer                      | 3 (0.6%)             |
| Carcinoma of unknown primary (CUP)  | 13 (2.5%)            |
| Uterine Cancer                      | 24 (4.7%)            |

**Supplementary Table S2. Examples of completed or ongoing trials of adenosine receptor antagonists in oncology**

| Drug                                                                                | Target                                                                       | Diseases                                                                                                                                                                          | Company                 | Number of clinical trials registered in NCT (clinicaltrials.gov) | Comment/Results                                                                         |
|-------------------------------------------------------------------------------------|------------------------------------------------------------------------------|-----------------------------------------------------------------------------------------------------------------------------------------------------------------------------------|-------------------------|------------------------------------------------------------------|-----------------------------------------------------------------------------------------|
| NIR178 in combination with PDR001<br><br>Phase II<br><br>Active but not recruiting. | NIR178 is an A2A adenosine receptor antagonist.<br><br>PDR001 is an anti PD1 | NSCLC<br>RCC<br>Pancreatic Cancer<br>Urothelial Cancer<br>HNSCC<br>Diffused Large B Cell Lymphoma<br>Microsatellite Stable<br>Colon Cancer<br>TNBC<br>Melanoma<br>Metastatic CRPC | Novartis                | NCT03207867                                                      |                                                                                         |
| Etrumadenant (AB928) in combination with mFOLFOX<br><br>Phase I/Ib completed.       | Etrumadenant is an <b>A2A</b> and A2B adenosine receptor antagonist.         | Advanced stage<br>Gastroesophageal cancer<br>Colorectal cancer.                                                                                                                   | Arcus Biosciences, Inc. | NCT03720678                                                      | None yet                                                                                |
| PBF-509 +PDR001<br><br>Phase I completed.                                           | PBF-509 (A2A adenosine receptor antagonist)                                  | NSCLC                                                                                                                                                                             | Novartis                | NCT02403193                                                      |                                                                                         |
| Drug:<br>Ciforadenant (arm 1)<br>Ciforadenant +Atezolizumab (arm 2)                 | Ciforadenant, an oral small molecule targeting the-A2A adenosine receptor.   | RCC<br>CRPC                                                                                                                                                                       | Genentech               | NCT02655822                                                      | For cifrodenant monotherapy arm high-grade arthralgia, peripheral edema and anemia were |

|                                                                              |                                                                                                                                                                |                                              |                         |             |                                                                                                                                                                                                                                                   |
|------------------------------------------------------------------------------|----------------------------------------------------------------------------------------------------------------------------------------------------------------|----------------------------------------------|-------------------------|-------------|---------------------------------------------------------------------------------------------------------------------------------------------------------------------------------------------------------------------------------------------------|
| Phase I completed                                                            |                                                                                                                                                                |                                              |                         |             | <p>observed in 3% cases.<br/>For combination arm grade <math>\frac{3}{4}</math> abdominal, pain, high AST, hypophosphatemia and arthralgia was observed in 2.9% cases.</p> <p>Ciforadenant plus atezolizumab showed a partial response of 11%</p> |
| SRF617 in combination with etrumadenant and zimberelimab Phase II Recruiting | <p>Etrumadenant is an A2aR and A2bR antagonist.<br/>SRF 617 is CD39 inhibitor.</p> <p>Zimberelimab is a fully human anti-PD-1 monoclonal antibody.</p>         | Metastatic CRPC                              | Arcus Biosciences, Inc. | NCT05177770 |                                                                                                                                                                                                                                                   |
| Zimberelimab + Domvanalimab + Etrumadenant Phase 2 Recruiting                | <p>Etrumadenant is an <b>A2A</b> and A2B adenosine receptor antagonist.<br/>Zimberelimab is an anti PD1 antibody,<br/>Domvanalimab is anti TIGIT antibody.</p> | NSCLC                                        | Arcus Biosciences       | NCT04262856 |                                                                                                                                                                                                                                                   |
| DFF332 + +PDR001 (Spartalizumab) +NIR178 (Taminadenant)                      | DFF332(Hif2alpha inhibitor) + PDR001 is anti PD1 inhibitor + NIR178 which is an adenosine A2A adenosine receptor antagonist.                                   | RCC                                          | Novartis                | NCT04895748 |                                                                                                                                                                                                                                                   |
| Etrumedanant + Zimberelimab                                                  | Etrumedanant is an A2A adenosine receptor antagonist.                                                                                                          | NSCLC, HNSCC, CRC, Melanoma, Bladder Cancer, | Arcus Bio               | NCT03629756 |                                                                                                                                                                                                                                                   |

|                                                                                                                        |                                                                                                |                                               |                           |             |  |
|------------------------------------------------------------------------------------------------------------------------|------------------------------------------------------------------------------------------------|-----------------------------------------------|---------------------------|-------------|--|
| Phase I completed                                                                                                      | Zimberelimab is an anti PD1 antibody                                                           | Ovarian Cancer, Endometrial Cancer, RCC, CRPC |                           |             |  |
| Etrumadenant<br>IPI- 549<br>Pegylated<br>Liposomal<br>Doxorubicin (PLD)<br>Nanoparticle<br>albumin-bound<br>paclitaxel | Etrumedenant is an A2A adenosine receptor antagonist.<br>IPI-549 is PI3kinase gamma inihibitor | TNBC<br>Ovarian Cancer                        | Arcus Bio                 | NCT03719326 |  |
| Preladenant,<br>pembrolizumab<br>Phase I                                                                               | Preladenant is A2A adenosine receptor antagonist.                                              | Solid tumors                                  | Merck Sharp & Dohme Corp. | NCT03099161 |  |
| AZD4635                                                                                                                | A2A adenosine receptor antagonist.                                                             | Solid tumors                                  | Astrazeneca               | NCT03980821 |  |
| Regorafenib,<br>atezolizumab,<br>imprime PGG,<br>bevacizumab,<br>isatuximab,<br>selicrelumab,<br>idasanutlin,<br>AB928 | AB928 is a small-molecule A2A/A2B adenosine receptor antagonist                                | CRC                                           | Hoffmann–La Roche         | NCT03555149 |  |
| PBF1129.<br>Nivolumab                                                                                                  | A2B Receptor Inhibitor                                                                         | NSCLC                                         | Palobiofarma              | NCT05234307 |  |
| Inupadenant                                                                                                            | A2A Receptor Inhibitor                                                                         | Solid tumors                                  | iTeos Therapeutics        | NCT05060432 |  |

Foot note: Data search as of June17th, 2023 (Pubmed and Clinicaltrials.gov).

**Abbreviations:** Castrate-resistant prostate cancer (CRPC); Colorectal cancer (CRC); Head and neck squamous cell carcinoma (HNSCC); Non-small cell lung cancer (NSCLC); Renal cell carcinoma (RCC); Triple-negative breast cancer (TNBC).
